# Supplementary material for: Atmospheric annealing effect on TiO2/Sb2S3/P3HT heterojunction hybrid solar cell performance
Source: Royal Society of Chemistry journal article supplement (doi:10.1039/c6ra20378g), 2016-01-01
Supplement: c6ra20378g1.pdf [file c6ra20378g1.pdf]

## Atmospheric annealing effect on TiO<sub>2</sub>/Sb<sub>2</sub>S<sub>3</sub>/P3HT heterojunctions hybrid solar cells performance

M. Kamruzzaman<sup>1\*</sup>, L. Chaoping<sup>2</sup>, F. Yishu<sup>1</sup>, A. K. M. Farid Ul Islam<sup>3</sup> and J.A. Zapien<sup>1\*</sup>

<sup>1</sup>Department of Physics and Materials Science and Center Of Super-Diamond and Advanced Films (COSDAF), City University of Hong Kong, Hong Kong SAR, P. R. China

Corresponding Authors E-mail: ([kzaman.phy11@gmail.com](mailto:kzaman.phy11@gmail.com), [apjazzs@cityu.edu.hk](mailto:apjazzs@cityu.edu.hk))

[yishufoo@gmail.com](mailto:yishufoo@gmail.com)

<sup>2</sup>Department of Physics and Materials Science, City University of Hong Kong, Hong Kong SAR, P. R. China

E-mail: [liuchaoping7281@hotmail.com](mailto:liuchaoping7281@hotmail.com)

<sup>3</sup>Department of Computer Science and Engineering, Begum Rokeya University, Rangpur, Rangpur 5400, Bangladesh

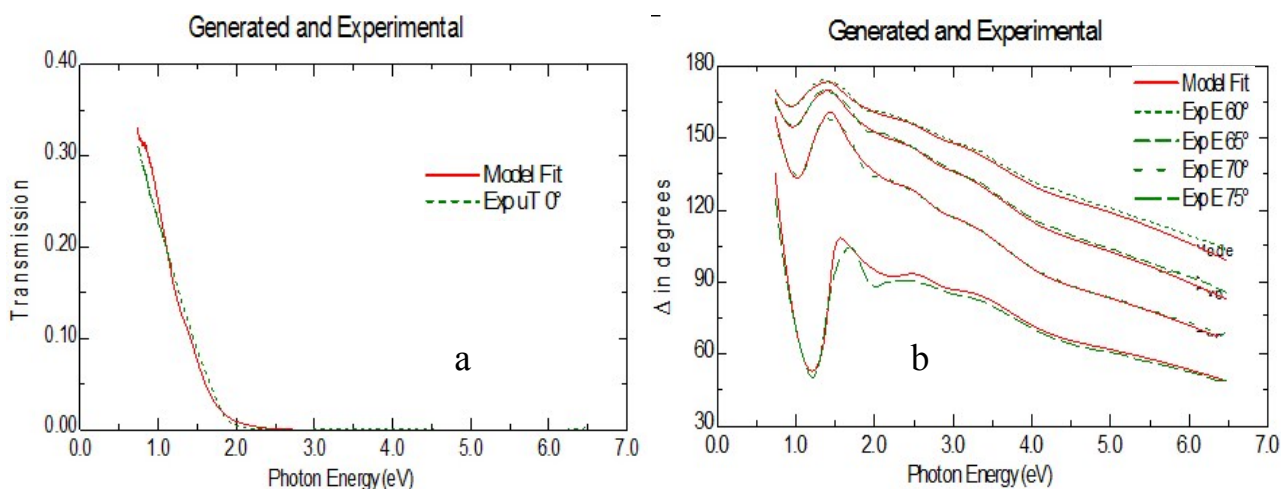

**Fig. 1.S1** Fitting data with model for 100.0±10 nm thickness of Sb<sub>2</sub>S<sub>3</sub> (a) transmittance vs. photon energy and (b) delta vs. photon energy.

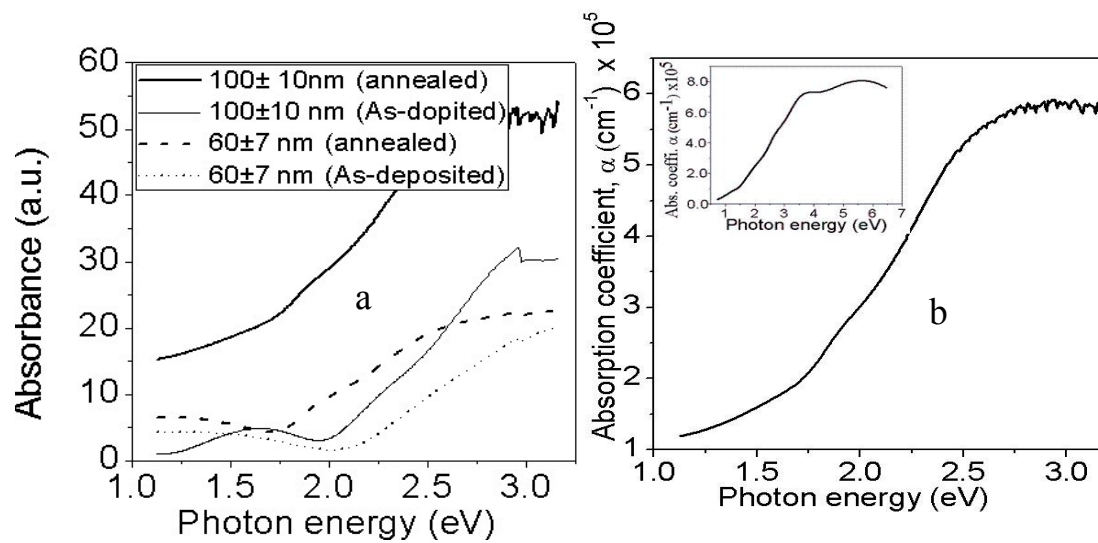

**Fig.2.S2** (a) Absorbance of  $\text{Sb}_2\text{S}_3$  for 60.0±7 and 100.0±10 nm thickness, and (b) absorption coefficient for 100±10 nm thickness.
